# Supplementary material for: Including ash in UKESM1 model simulations of the Raikoke volcanic eruption reveals improved agreement with observations
Source: Copernicus journal article supplement (doi:10.5194/acp-23-3985-2023), 2023-04-04
Supplement: Supplementary file 1 [file acp-23-3985-2023-supplement.pdf]

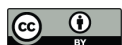

*Supplement of*

## **Including ash in UKESM1 model simulations of the Raikoke volcanic eruption reveals improved agreement with observations**

**Alice F. Wells et al.**

*Correspondence to:* Alice F. Wells ([afw207@exeter.ac.uk](mailto:afw207@exeter.ac.uk))

The copyright of individual parts of the supplement might differ from the article licence.

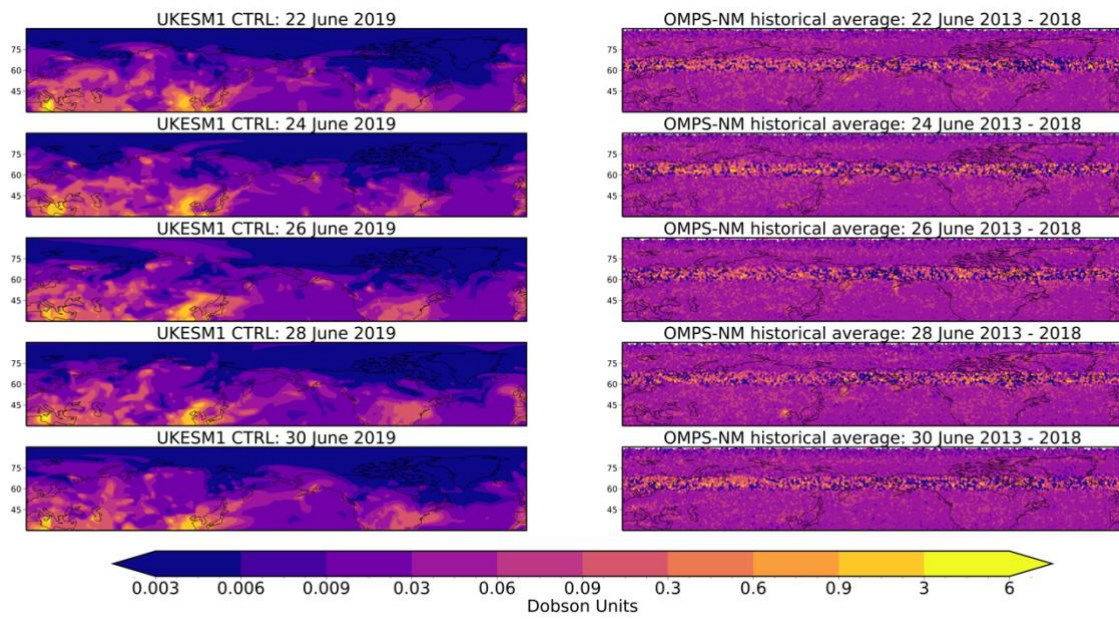

**Figure S1:** Geographic evolution of column integrated SO<sub>2</sub> plume in Dobson Units (DU) for the UKESM1 CTRL simulation (left) and the long-term background SO<sub>2</sub> burden derived from OMPS-NM for the years 2013–2018 (right).

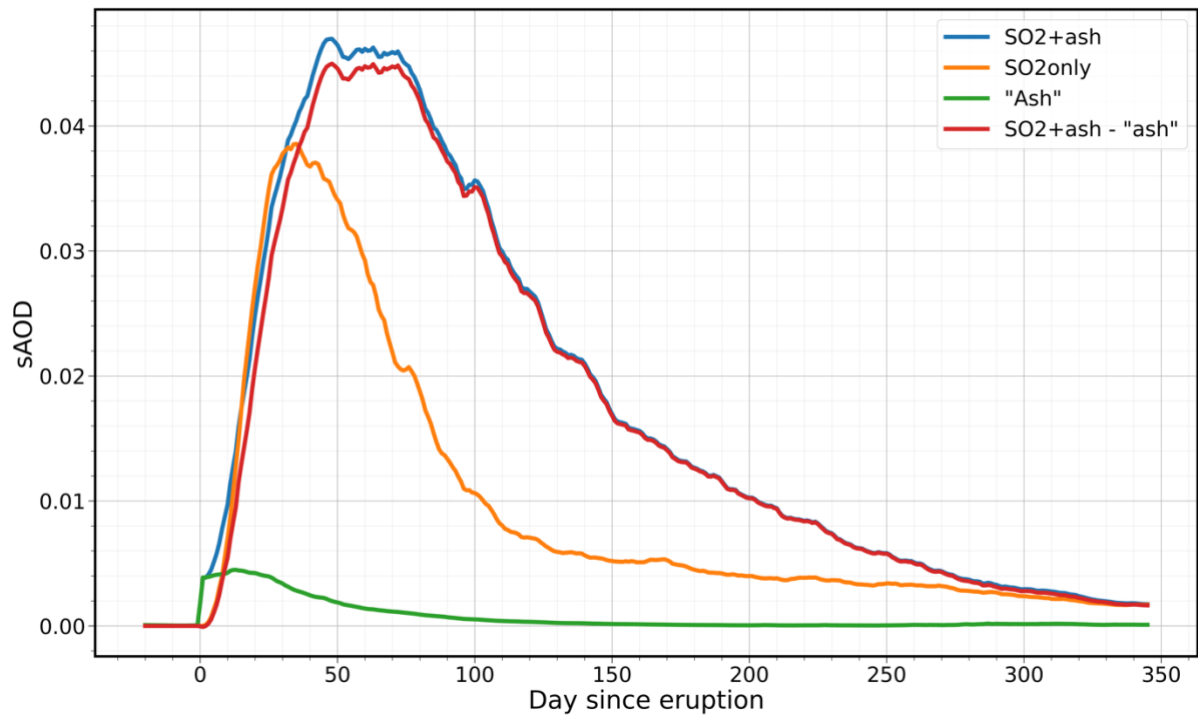

**Figure S2:** Daily stratospheric aerosol optical depth (sAOD) at 550nm averaged over 30–90°N. UKESM1 SO2only (orange) and SO2+ash (blue). CLASSIC dust sAOD (green) and SO2+ash minus CLASSIC dust sAOD (red).
